# Supplementary material for: Analysis of chikungunya virus proteins reveals that non-structural proteins nsP2 and nsP3 exhibit RNA interference (RNAi) suppressor activity
Source: PubMed Central journal article supplement (PMC5128919; doi:10.1038/srep38065), 2016-11-30
Supplement: srep38065-s1.pdf [file srep38065-s1.pdf]

**Analysis of chikungunya virus proteins reveals that non-structural proteins nsP2 and nsP3 exhibit RNA interference (RNAi) suppressor activity**

Kalika Mathur<sup>1</sup>, Abhishek Anand<sup>2</sup>, Sunil Kumar Dubey<sup>1</sup>, Neeti Sanan-Mishra<sup>2</sup>, Raj K Bhatnagar<sup>1\*</sup>, Sujatha Sunil<sup>1\*</sup>

## Supporting information

(a) Sf21 cell line

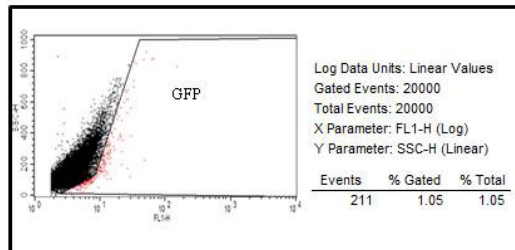

(b) Sf21 transfected with GFP plasmid

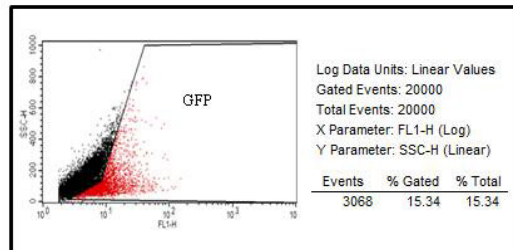

(c) Sf21 cotransfected with GFP and nsP2

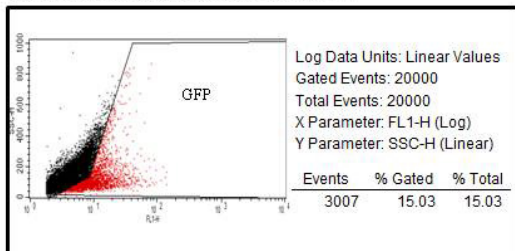

(d) Sf21 co-transfected with GFP and nsP3

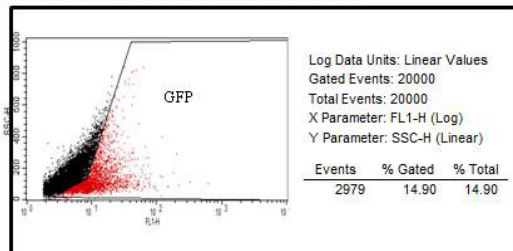

**Supplementary Figure S1.** Trans-activation assay of CHIKV VSRs. Sf21 cell line was co-transfected with GFP plasmid and VSR plasmids. FACS analysis was done after 72h.

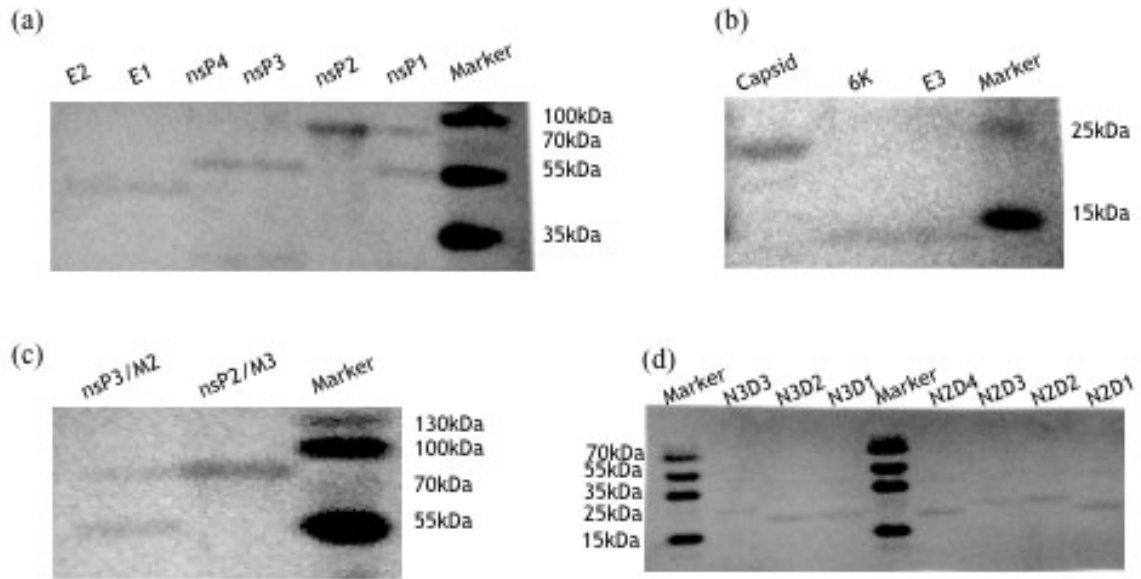

**Supplementary Figure S2. Western blotting of CHIKV plasmid constructs.** Sf21 cell line was transfected with CHIKV plasmids. Cells were harvested after 72h and western blotting was done using anti-His primary antibody and AP conjugated secondary antibody.

**Supplementary Table 1. Primers used in the study**

| S.No. | Plasmid                                                  | Primer Sequence                                              |
|-------|----------------------------------------------------------|--------------------------------------------------------------|
|       | <b>pIB/V5-His TOPO (Transfection in Sf21 &amp; Aag2)</b> |                                                              |
| 1     | nsP1                                                     | FP: GTAATGGATCCTGTGTACGTGG<br>RP: TGCACCCGCTCTGTCCT          |
| 2     | nsP2                                                     | FP: GTAATGGGAATAATAGAGACTCCGAGA<br>RP: TCCTGCTCGGGTGGCCTG    |
| 3     | nsP3                                                     | FP: GTAATGGGATGTGCACCGTCGTACCGG<br>RP: TTACTCGTCGTCCGTGTCTG  |
| 4     | nsP4                                                     | FP: GTAATGGGACGACTAGACAGGGCAGGTG<br>RP: AGGACCGCCGTACAAAGTTA |
| 5     | E1                                                       | FP: GTAATGGCGTACGAACACGTAACAG<br>RP: TTAGTGCTGTGTAACGACAC    |
| 6     | E2                                                       | FP:GTAATGGGAAGCACCAAGGACAACCTCAAT<br>RP: TTTAGCTGTCTGATGCAGC |
| 7     | E3                                                       | FP: GTAATGGGATGGAGTCTTGCCATCCCAGT<br>RP: GCGTCGCTGGCGGTGG    |
| 8     | Capsid                                                   | FP: GTAATGGAGTTCATCCCAACCC<br>RP: CTCTTCGGCTCCCTCAG          |

|    |                                               |                                                                               |
|----|-----------------------------------------------|-------------------------------------------------------------------------------|
| 9  | 6K                                            | FP: GTAATGGCGGCCACATACCAAGAG<br>RP: GCTCACAGTGTGGGCAC                         |
| 10 | N2D1                                          | FP: GTAATGGGAATAATAGAGACTCCGAGA<br>RP: GACTGCAATTTGTATGGGCAG                  |
| 11 | N2D2                                          | FP: ATCGGATCCGTAATGGGAATAGGAGTCTTCG<br>RP: TGTCTCCATACCAGTTACCTTC             |
| 12 | N2D3                                          | FP: ATCGGATCCGTAATGGGACTCTCCGGTGACC<br>RP: CTTGTAAACCAGCCATTCCATTC            |
| 13 | N2D4                                          | FP: ATCGGATCCGTAATGGGAATAAACGGCCACCA<br>RP: TCCTGCTCGGGTGGCCTG                |
| 14 | N3D1                                          | FP: GTAATGGGATGTGCACCGTCGTACCGG<br>RP: TTGGGTCCGCATCTGTAT                     |
| 15 | N3D2                                          | FP: ATCGGATCCGTAATGGTGGAGCTGCTGG<br>RP: GTATTCCCTGGACTTACGCG                  |
| 16 | N3D3                                          | FP: ATCGGATCCGTAATGGGAAGACCTTCCAGGAGT<br>RP: TTAATCGTCCGTGTCTG                |
|    | <b>pcDNA 3.1(+)</b> (Transfection in HEK293T) |                                                                               |
| 17 | nsP1                                          | FP: ATCAAGCTTGTAATGGATCCTGTGTACGTGG<br>RP: ATCGAATTCATTTGCACCCGCTCTGTCCT      |
| 18 | nsP2                                          | FP: ATCGGATCCGTAATGGGAATAATAGAGACTCCGAGA<br>RP: ATCCTCGAGATTTCTGCTCGGGTGGC    |
| 19 | nsP3                                          | FP: ATCGGATCCGTAATGGGATGTGCACCGTCGTA<br>RP: ATCGAATTCATTTAACTCGTCCGTGTCTG     |
| 20 | nsP4                                          | FP: ATCGGATCCGTAATGGGACGACTAGACAGGG<br>RP: ATCGAATTCATTAGGACCCGCTACAAAGTTA    |
| 21 | E1                                            | FP: ATCGGATCCGTAATGGCGTACGAACACGTAACAG<br>RP: ATCGAATTCATTGTGCCTGCTGAACGACAC  |
| 22 | E2                                            | FP: ATCGGATCCGTAATGGGAAGCACCAAGGACA<br>RP: ATCGAATTCATTTTAGCTGTTCTGATGCAGC    |
| 23 | E3                                            | FP: ATCGGATCCGTAATGGGATGGAGTCTTGCCATCCCAGT<br>RP: ATCGAATTCATTGCGTCCGTGGCGGTG |
| 24 | Capsid                                        | FP: ATCGGATCCGTAATGGAGTTCATCCCAACCCA<br>RP: ATCGAATTCATTCTCTTCGGCTCCCTCAG     |
| 25 | 6K                                            | FP: ATCGGATCCGTAATGGCGGCCACATACCAA<br>RP: ATCGAATTCATTGCTCACAGTGTGGGCAC       |
| 26 | <b>shRNA oligonucleotide</b>                  | GGT TAT GTA CAG GAA CGC ATT CAA GAG ATG CGT TCC TGT ACA TAA<br>CCT T          |
